# Supplementary material for: Astrocytic modulation of excitatory synaptic signaling in a mouse model of Rett syndrome
Source: eLife journal article supplement (doi:10.7554/elife.31629), 2018-01-09
Supplement: supp [file elife-31629-supp-v1.zip]

Archive with 7 entries (7 files):
- elife_poa_e31629_Figure_6_figure_supplement_1.pdf
- elife_poa_e31629_Figure_6_figure_supplement_2.pdf
- elife_poa_e31629_Figure_8_figure_supplement_2.pdf
- elife_poa_e31629_Figure_8_figure_supplement_1.pdf
- elife_poa_e31629_Figure_2_figure_supplement_1.pdf
- elife_poa_e31629_Figure_11_figure_supplement_1.pdf
- elife_poa_e31629_Transparent_Reporting_File.pdf
