# Supplementary material for: Astrocytic modulation of excitatory synaptic signaling in a mouse model of Rett syndrome
Source: eLife journal article supplement (doi:10.7554/elife.31629), 2018-01-09

Figure 6- figure supplement 2

a. GABAR Antagonist

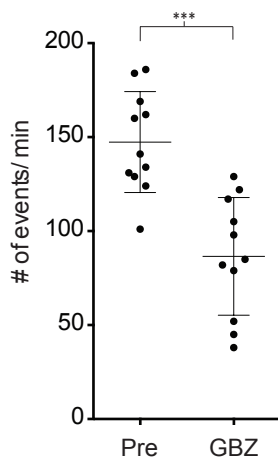

b. GluR Antagonist

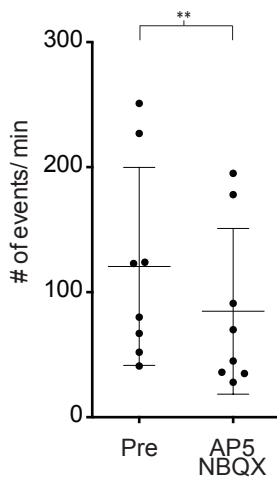

c. GABAR Antagonist

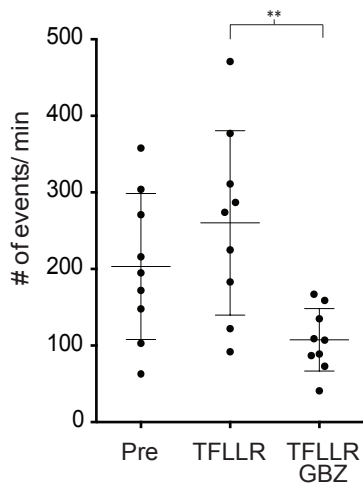

d. GluR Antagonist

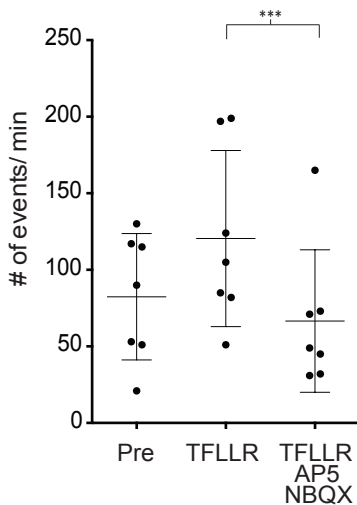

Supplement: supp [file elife_poa_e31629_Figure_6_figure_supplement_2.pdf › elife_poa_e31629_Figure_6_figure_supplement_2.pdf]
