# Supplementary figures and images for: Astrocytic modulation of excitatory synaptic signaling in a mouse model of Rett syndrome
Source: eLife journal article supplement (doi:10.7554/elife.31629), 2018-01-09

Figure 6- figure supplement 1

a. GABAR Antagonist

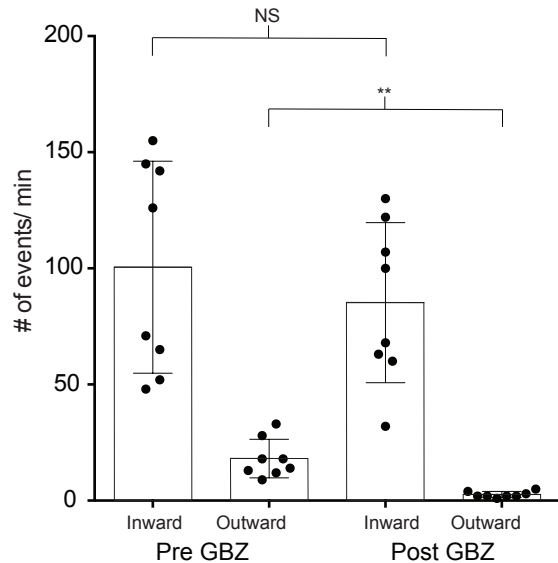

b. GluR Antagonist

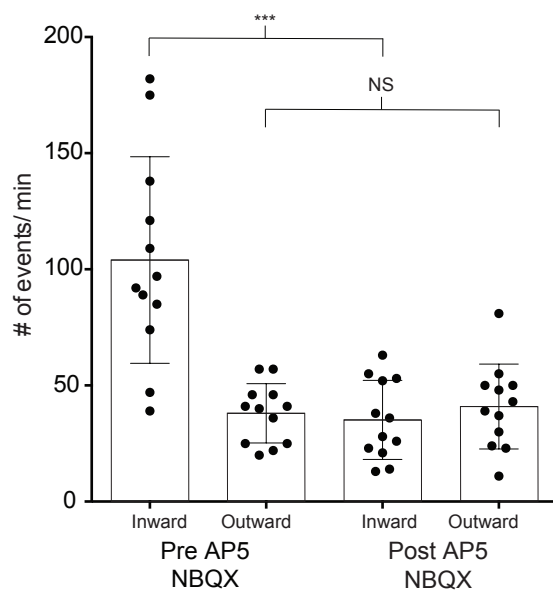

Supplement: supp [file elife-31629-supp-v1.zip › elife_poa_e31629_Figure_6_figure_supplement_1.pdf]

Figure 8- figure supplement 2

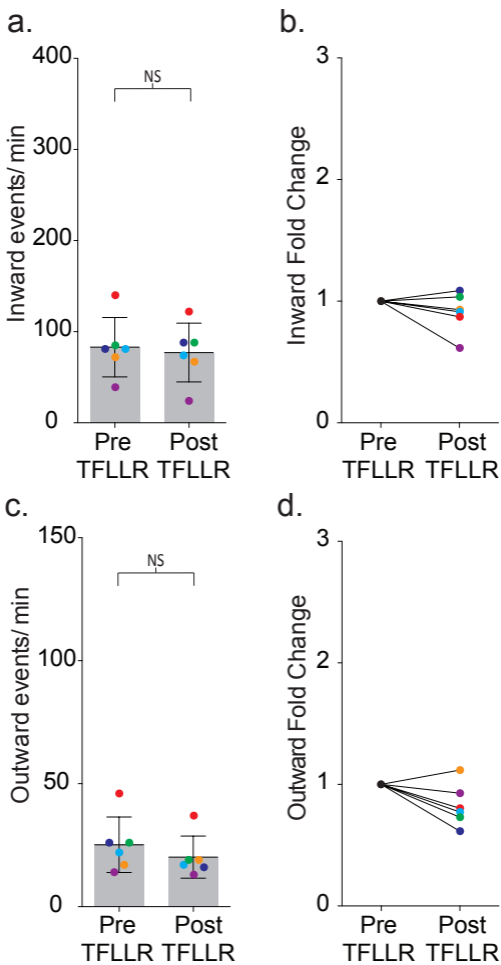

Supplement: supp [file elife-31629-supp-v1.zip › elife_poa_e31629_Figure_8_figure_supplement_2.pdf]

# Figure 8-figure supplement 1

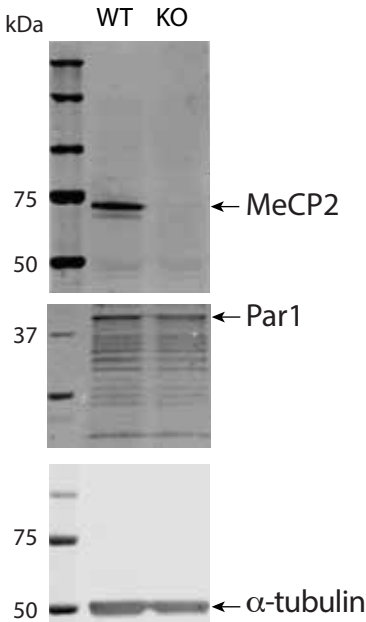

Supplement: supp [file elife-31629-supp-v1.zip › elife_poa_e31629_Figure_8_figure_supplement_1.pdf]

Figure 2-figure supplement 1

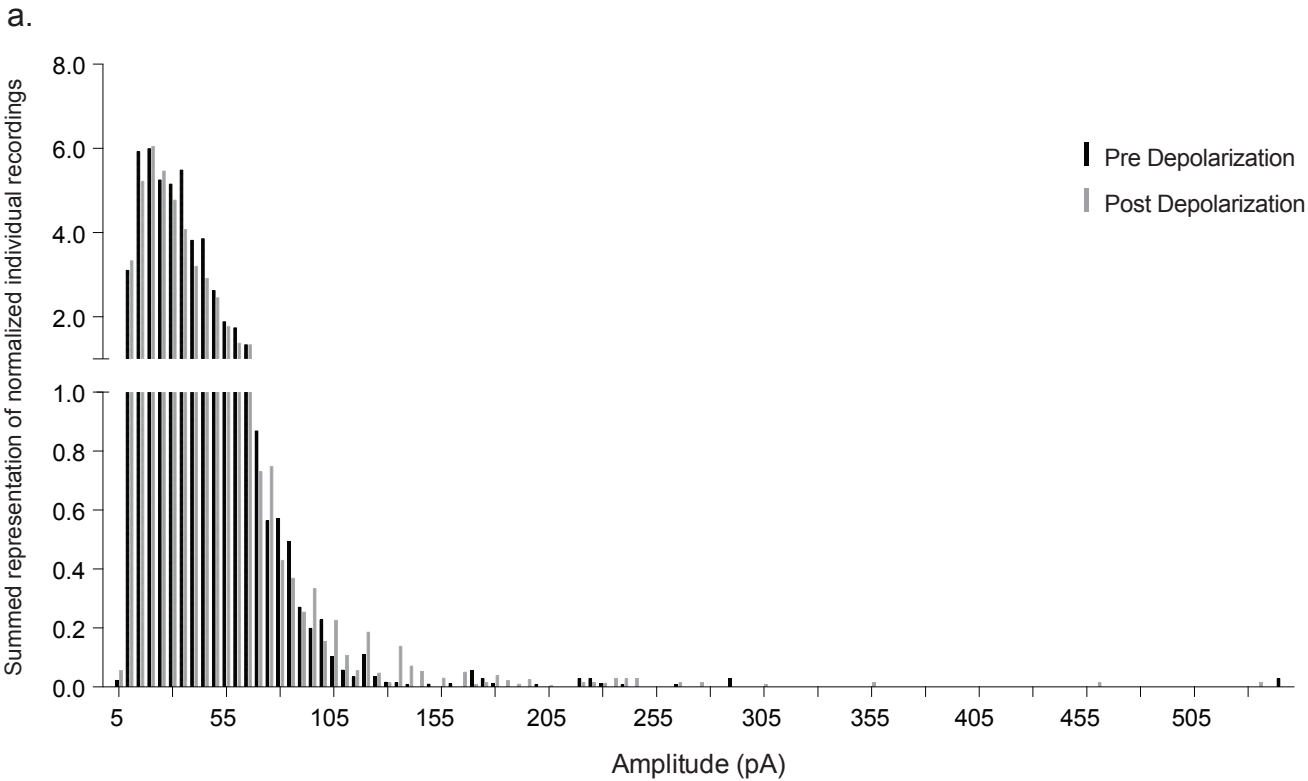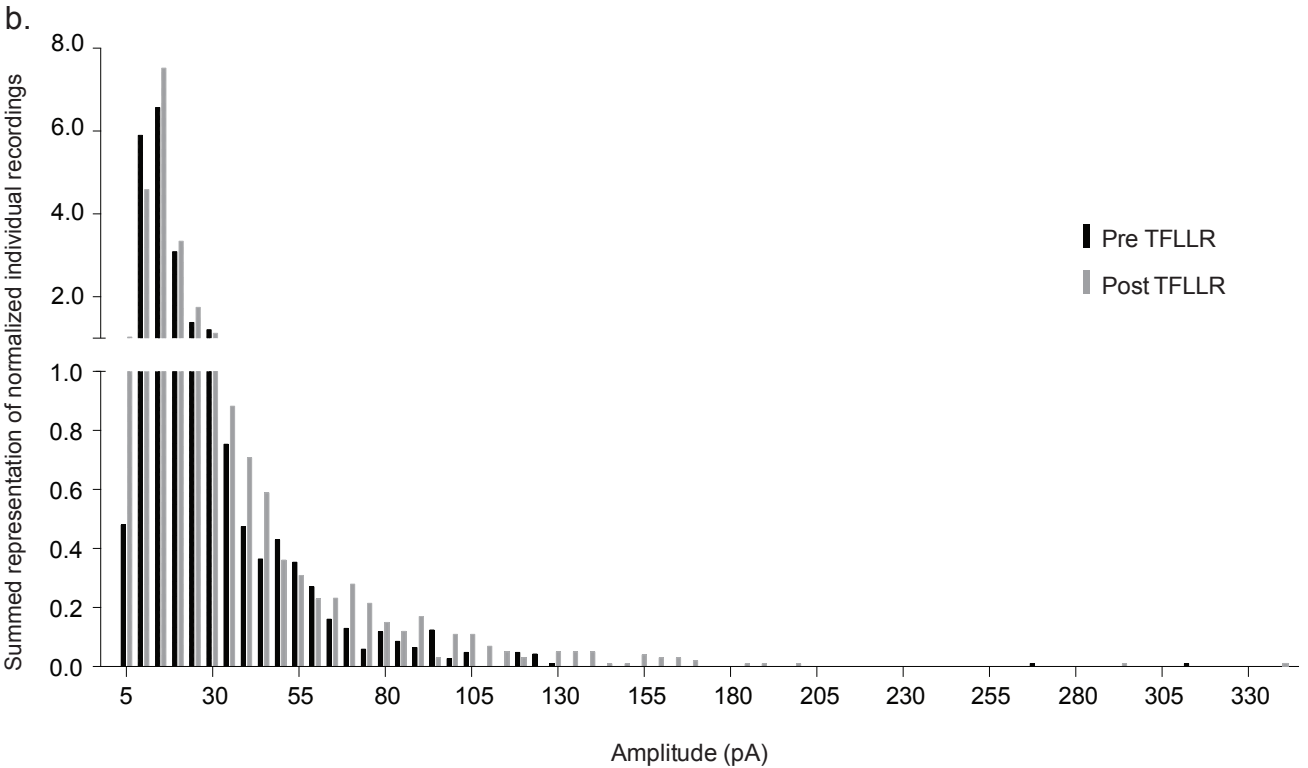

Supplement: supp [file elife-31629-supp-v1.zip › elife_poa_e31629_Figure_2_figure_supplement_1.pdf]

Figure 11- figure supplement 1

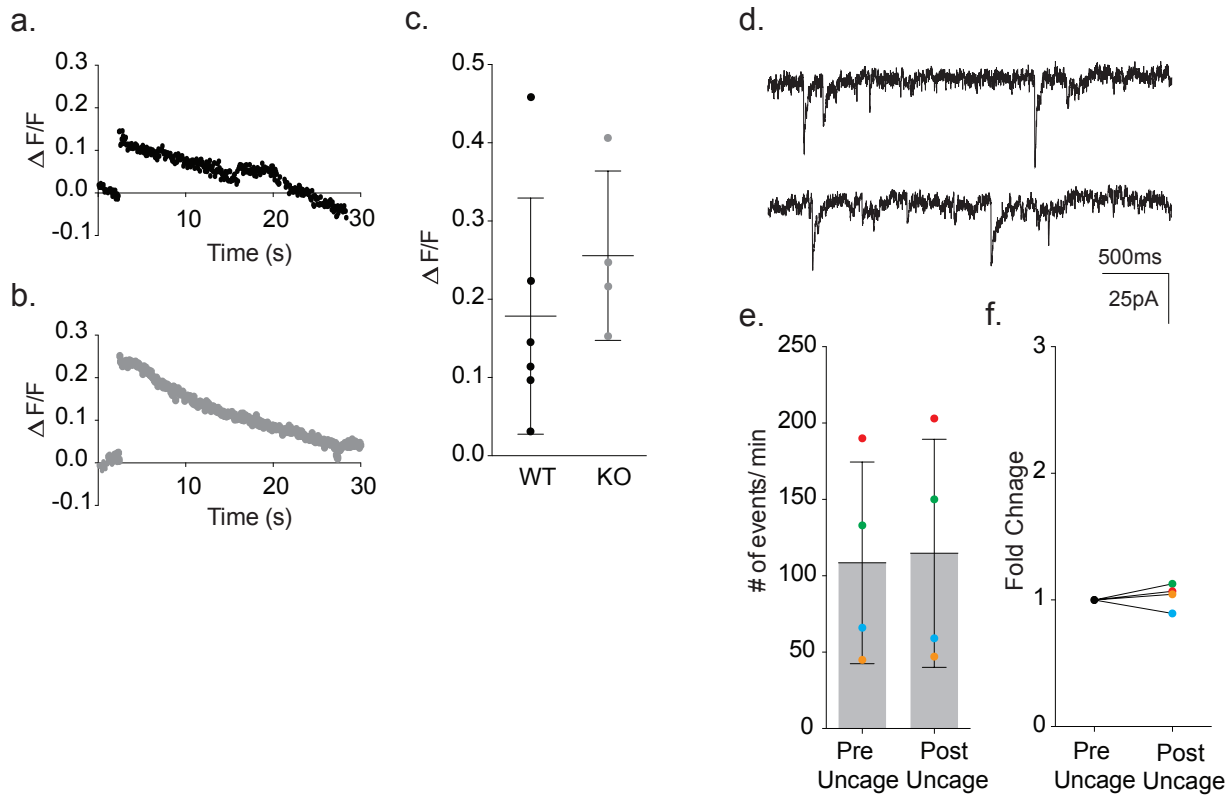

Supplement: supp [file elife-31629-supp-v1.zip › elife_poa_e31629_Figure_11_figure_supplement_1.pdf]
